# Supplementary material for: Substrate-triggered position switching of TatA and TatB during Tat transport in Escherichia coli
Source: PubMed Central journal article supplement (PMC5577447; doi:10.1098/rsob.170091), 2017-08-16
Supplement: rsob170091supp1.pdf [file rsob170091supp1.pdf]

**Substrate-triggered position-switching of TatA and  
TatB in the *Escherichia coli* Tat protein export  
pathway.**

Johann Habersetzer<sup>1\*</sup>, Kristoffer Moore<sup>1\*</sup>, Jon Cherry<sup>1</sup>, Grant Buchanan<sup>1</sup>, Phillip Stansfeld<sup>2</sup>  
and Tracy Palmer<sup>1§</sup>

**Supplementary Information**

| Plasmid               | Relevant genotype                                                                                           | Source     |
|-----------------------|-------------------------------------------------------------------------------------------------------------|------------|
| pUNITATCC4            | pQE60, encoding <i>TatA</i> , <i>TatB</i> and <i>TatC</i> (all four Cys of <i>TatC</i> substituted for Ala) | [34]       |
| pUNI4 AL6C, CV212C    | pUNITATCC4, <i>TatA</i> <sup>L6C</sup> , <i>TatC</i> <sup>V212C</sup>                                       | This study |
| pUNI4 AL9C, CM205C    | pUNITATCC4, <i>TatA</i> <sup>L9C</sup> , <i>TatC</i> <sup>M205C</sup>                                       | This study |
| pUNI4 AL9C, CL206C    | pUNITATCC4, <i>TatA</i> <sup>L9C</sup> , <i>TatC</i> <sup>L206C</sup>                                       | This study |
| pUNI4 AL9C, CL207C    | pUNITATCC4, <i>TatA</i> <sup>L9C</sup> , <i>TatC</i> <sup>L207C</sup>                                       | This study |
| pUNI4 AL9C, CT208C    | pUNITATCC4, <i>TatA</i> <sup>L9C</sup> , <i>TatC</i> <sup>T208C</sup>                                       | This study |
| pUNI4 AL9C, CP209C    | pUNITATCC4, <i>TatA</i> <sup>L9C</sup> , <i>TatC</i> <sup>P209C</sup>                                       | This study |
| pUNI4 AL9C, CP210C    | pUNITATCC4, <i>TatA</i> <sup>L9C</sup> , <i>TatC</i> <sup>P210C</sup>                                       | This study |
| pUNI4 AL9C, CD211C    | pUNITATCC4, <i>TatA</i> <sup>L9C</sup> , <i>TatC</i> <sup>D211C</sup>                                       | This study |
| pUNI4 AL9C, CV212C    | pUNITATCC4, <i>TatA</i> <sup>L9C</sup> , <i>TatC</i> <sup>V212C</sup>                                       | This study |
| pUNI4 AL9C, CF213C    | pUNITATCC4, <i>TatA</i> <sup>L9C</sup> , <i>TatC</i> <sup>F213C</sup>                                       | This study |
| pUNI4 AL9C, CS214C    | pUNITATCC4, <i>TatA</i> <sup>L9C</sup> , <i>TatC</i> <sup>S214C</sup>                                       | This study |
| pUNI4 AL9C, CQ215C    | pUNITATCC4, <i>TatA</i> <sup>L9C</sup> , <i>TatC</i> <sup>Q215C</sup>                                       | This study |
| pUNI4 AL9C, CT216C    | pUNITATCC4, <i>TatA</i> <sup>L9C</sup> , <i>TatC</i> <sup>T216C</sup>                                       | This study |
| pUNI4 AL10C, CM205C   | pUNITATCC4, <i>TatA</i> <sup>L10C</sup> , <i>TatC</i> <sup>M205C</sup>                                      | This study |
| pUNI4 AL10C, CL206C   | pUNITATCC4, <i>TatA</i> <sup>L10C</sup> , <i>TatC</i> <sup>L206C</sup>                                      | This study |
| pUNI4 AL10C, CL207C   | pUNITATCC4, <i>TatA</i> <sup>L10C</sup> , <i>TatC</i> <sup>L207C</sup>                                      | This study |
| pUNI4 AL10C, CT208C   | pUNITATCC4, <i>TatA</i> <sup>L10C</sup> , <i>TatC</i> <sup>T208C</sup>                                      | This study |
| pUNI4 AL10C, CP209C   | pUNITATCC4, <i>TatA</i> <sup>L10C</sup> , <i>TatC</i> <sup>P209C</sup>                                      | This study |
| pUNI4 AL10C, CP210C   | pUNITATCC4, <i>TatA</i> <sup>L10C</sup> , <i>TatC</i> <sup>P210C</sup>                                      | This study |
| pUNI4 AL10C, CD211C   | pUNITATCC4, <i>TatA</i> <sup>L10C</sup> , <i>TatC</i> <sup>D211C</sup>                                      | This study |
| pUNI4 AL10C, CV212C   | pUNITATCC4, <i>TatA</i> <sup>L10C</sup> , <i>TatC</i> <sup>V212C</sup>                                      | This study |
| pUNI4 AL10C, CF213C   | pUNITATCC4, <i>TatA</i> <sup>L10C</sup> , <i>TatC</i> <sup>F213C</sup>                                      | This study |
| pUNI4 AL10C, CS214C   | pUNITATCC4, <i>TatA</i> <sup>L10C</sup> , <i>TatC</i> <sup>S214C</sup>                                      | This study |
| pUNI4 AL10C, CQ215C   | pUNITATCC4, <i>TatA</i> <sup>L10C</sup> , <i>TatC</i> <sup>Q215C</sup>                                      | This study |
| pUNI4 AL10C, CT216C   | pUNITATCC4, <i>TatA</i> <sup>L10C</sup> , <i>TatC</i> <sup>T216C</sup>                                      | This study |
| pUNI4 AL11C, CM205C   | pUNITATCC4, <i>TatA</i> <sup>L11C</sup> , <i>TatC</i> <sup>M205C</sup>                                      | This study |
| pUNI4 AL11C, CL206C   | pUNITATCC4, <i>TatA</i> <sup>L11C</sup> , <i>TatC</i> <sup>L206C</sup>                                      | This study |
| pUNI4 AL11C, CL207C   | pUNITATCC4, <i>TatA</i> <sup>L11C</sup> , <i>TatC</i> <sup>L207C</sup>                                      | This study |
| pUNI4 AL11C, CT208C   | pUNITATCC4, <i>TatA</i> <sup>L11C</sup> , <i>TatC</i> <sup>T208C</sup>                                      | This study |
| pUNI4 AL11C, CP209C   | pUNITATCC4, <i>TatA</i> <sup>L11C</sup> , <i>TatC</i> <sup>P209C</sup>                                      | This study |
| pUNI4 AL11C, CP210C   | pUNITATCC4, <i>TatA</i> <sup>L11C</sup> , <i>TatC</i> <sup>P210C</sup>                                      | This study |
| pUNI4 AL11C, CD211C   | pUNITATCC4, <i>TatA</i> <sup>L11C</sup> , <i>TatC</i> <sup>D211C</sup>                                      | This study |
| pUNI4 AL11C, CV212C   | pUNITATCC4, <i>TatA</i> <sup>L11C</sup> , <i>TatC</i> <sup>V212C</sup>                                      | This study |
| pUNI4 AL11C, CF213C   | pUNITATCC4, <i>TatA</i> <sup>L11C</sup> , <i>TatC</i> <sup>F213C</sup>                                      | This study |
| pUNI4 AL11C, CS214C   | pUNITATCC4, <i>TatA</i> <sup>L11C</sup> , <i>TatC</i> <sup>S214C</sup>                                      | This study |
| pUNI4 AL11C, CQ215C   | pUNITATCC4, <i>TatA</i> <sup>L11C</sup> , <i>TatC</i> <sup>Q215C</sup>                                      | This study |
| pUNI4 AL11C, CT216C   | pUNITATCC4, <i>TatA</i> <sup>L11C</sup> , <i>TatC</i> <sup>T216C</sup>                                      | This study |
| pUNI4 AA13C, CI220C   | pUNITATCC4, <i>TatA</i> <sup>A13C</sup> , <i>TatC</i> <sup>I220C</sup>                                      | This study |
| pUNI4 AV17C, CE227C   | pUNITATCC4, <i>TatA</i> <sup>V17C</sup> , <i>TatC</i> <sup>E227C</sup>                                      | This study |
| pUNITATCC4 Δ <i>B</i> | As pUNITATCC4, in frame deletion of <i>tatB</i>                                                             | This study |

|                          |                                                                                                   |            |
|--------------------------|---------------------------------------------------------------------------------------------------|------------|
| pUNI4ΔB AL9C, CM205C     | pUNITATCC4ΔB, TatA <sup>L9C</sup> , TatC <sup>M205C</sup>                                         | This study |
| pUNI4ΔB AL9C, CL206C     | pUNITATCC4ΔB, TatA <sup>L9C</sup> , TatC <sup>L206C</sup>                                         | This study |
| pUNI4ΔB AL9C, CL207C     | pUNITATCC4ΔB, TatA <sup>L9C</sup> , TatC <sup>L207C</sup>                                         | This study |
| pUNI4ΔB AL9C, CT208C     | pUNITATCC4ΔB, TatA <sup>L9C</sup> , TatC <sup>T208C</sup>                                         | This study |
| pUNI4ΔB AL9C, CP209C     | pUNITATCC4ΔB, TatA <sup>L9C</sup> , TatC <sup>P209C</sup>                                         | This study |
| pUNI4ΔB AL9C, CP210C     | pUNITATCC4ΔB, TatA <sup>L9C</sup> , TatC <sup>P210C</sup>                                         | This study |
| pUNI4ΔB AL9C, CD211C     | pUNITATCC4ΔB, TatA <sup>L9C</sup> , TatC <sup>D211C</sup>                                         | This study |
| pUNI4ΔB AL9C, CV212C     | pUNITATCC4ΔB, TatA <sup>L9C</sup> , TatC <sup>V212C</sup>                                         | This study |
| pUNI4ΔB AL9C, CF213C     | pUNITATCC4ΔB, TatA <sup>L9C</sup> , TatC <sup>F213C</sup>                                         | This study |
| pUNI4ΔB AL9C, CS214C     | pUNITATCC4ΔB, TatA <sup>L9C</sup> , TatC <sup>S214C</sup>                                         | This study |
| pUNI4ΔB AL9C, CQ215C     | pUNITATCC4ΔB, TatA <sup>L9C</sup> , TatC <sup>Q215C</sup>                                         | This study |
| pUNI4ΔB AL9C, CT216C     | pUNITATCC4ΔB, TatA <sup>L9C</sup> , TatC <sup>T216C</sup>                                         | This study |
| pTAT101                  | Low copy number vector producing TatABC under control of <i>tat</i> promoter. Kan <sup>r</sup>    | [32]       |
| pTAT101 Cys-less         | As pTat101, all four Cys codons of <i>tatC</i> substituted for Ala codons)                        | [11]       |
| p101CC4 AS5C, CF213C     | pTat101 Cys-less, TatA <sup>S5C</sup> , TatC <sup>F213C</sup>                                     | This study |
| p101CC4 AL9C, CM205C     | pTat101 Cys-less, TatA <sup>L9C</sup> , TatC <sup>M205C</sup>                                     | This study |
| p101CC4 AL9C, CV212C     | pTat101 Cys-less, TatA <sup>L9C</sup> , TatC <sup>V212C</sup>                                     | This study |
| p101CC4 AL9C, CF213C     | pTat101 Cys-less, TatA <sup>L9C</sup> , TatC <sup>F213C</sup>                                     | This study |
| P101CC4 BL9C, CM205C     | pTat101 Cys-less, TatB <sup>L9C</sup> , TatC <sup>M205C</sup>                                     | This study |
| p101CC4 BL9C, CF213C     | pTat101 Cys-less, TatB <sup>L9C</sup> , TatC <sup>F213C</sup>                                     | This study |
| p101CC4 AL9C, CFEA,M205C | pTat101 Cys-less, TatA <sup>L9C</sup> , TatC <sup>F94A,E103A,M205C</sup>                          | This study |
| p101CC4 AL9C, CFEA,F213C | pTat101 Cys-less, TatA <sup>L9C</sup> , TatC <sup>F94A,E103A,F213C</sup>                          | This study |
| p101C*BC                 | pTH19Cr derivative. Expression of <i>tatBC</i> from the <i>tatA</i> promoter with a modified RBS. | [21]       |
| p101C*BC Cys-less        | As p101C*BC, producing Cys-less variant of TatC                                                   | This study |
| p101C*BF6C, CF213C       | As p101C*BC Cys-less, TatB <sup>F6C</sup> , TatC <sup>F213C</sup>                                 | This study |
| p101C*BE8C, CM205C       | As p101C*BC Cys-less, TatB <sup>E8C</sup> , TatC <sup>M205C</sup>                                 | This study |
| p101C*BL9C               | As p101C*BC Cys-less, TatB <sup>L9C</sup>                                                         | This study |
| p101C*BL9C, CM205C       | As p101C*BC Cys-less, TatB <sup>L9C</sup> , TatC <sup>M205C</sup>                                 | This study |
| p101C*BL9C, CL206C       | As p101C*BC Cys-less, TatB <sup>L9C</sup> , TatC <sup>L206C</sup>                                 | This study |
| p101C*BL9C, CL207C       | As p101C*BC Cys-less, TatB <sup>L9C</sup> , TatC <sup>L207C</sup>                                 | This study |
| p101C*BL9C, CT208C       | As p101C*BC Cys-less, TatB <sup>L9C</sup> , TatC <sup>T208C</sup>                                 | This study |
| p101C*BL9C, CP209C       | As p101C*BC Cys-less, TatB <sup>L9C</sup> , TatC <sup>P209C</sup>                                 | This study |
| p101C*BL9C, CP210C       | As p101C*BC Cys-less, TatB <sup>L9C</sup> , TatC <sup>P210C</sup>                                 | This study |
| p101C*BL9C, CD211C       | As p101C*BC Cys-less, TatB <sup>L9C</sup> , TatC <sup>D211C</sup>                                 | This study |
| p101C*BL9C, CV212C       | As p101C*BC Cys-less, TatB <sup>L9C</sup> , TatC <sup>V212C</sup>                                 | This study |
| p101C*BL9C, CF213C       | As p101C*BC Cys-less, TatB <sup>L9C</sup> , TatC <sup>F213C</sup>                                 | This study |
| p101C*BL9C, CS214C       | As p101C*BC Cys-less, TatB <sup>L9C</sup> , TatC <sup>S214C</sup>                                 | This study |
| p101C*BL9C, CQ215C       | As p101C*BC Cys-less, TatB <sup>L9C</sup> , TatC <sup>Q215C</sup>                                 | This study |
| p101C*BL9C, CT216C       | As p101C*BC Cys-less, TatB <sup>L9C</sup> , TatC <sup>T216C</sup>                                 | This study |

|                           |                                                                                 |            |
|---------------------------|---------------------------------------------------------------------------------|------------|
| p101C*BL10C, CL216C       | As p101C*BC Cys-less, TatB <sup>L10C</sup> , TatC <sup>L216C</sup>              | This study |
| p101C*BL10C, CF217C       | As p101C*BC Cys-less, TatB <sup>L10C</sup> , TatC <sup>F217C</sup>              | This study |
| p101C*BL11C, CF213C       | As p101C*BC Cys-less, TatB <sup>L11C</sup> , TatC <sup>F213C</sup>              | This study |
| p101C*BL11C, CL216C       | As p101C*BC Cys-less, TatB <sup>L11C</sup> , TatC <sup>L216C</sup>              | This study |
| p101C*BL11C, CF217C       | As p101C*BC Cys-less, TatB <sup>L11C</sup> , TatC <sup>F217C</sup>              | This study |
| p101C*BG16C, CV198C       | As p101C*BC Cys-less, TatB <sup>G16C</sup> , TatC <sup>V198C</sup>              | This study |
| p101C*BL9C,<br>CFEA,M205C | As p101C*BC Cys-less, TatB <sup>L9C</sup> ,<br>TatC <sup>F94A,E103A,M205C</sup> | This study |
| p101C*BL9C,<br>CFEA,F213C | As p101C*BC Cys-less, TatB <sup>L9C</sup> ,<br>TatC <sup>F94A,E103A,F213C</sup> | This study |
| pQE80-CueO                | As pQE80, encoding <i>E. coli</i> CueO with C-terminal his <sub>6</sub> -tag.   | [21]       |
| pTGS                      | pBAD33-based vector encoding TorAss-GFP-SsrA                                    | [47]       |

**Table S1. Plasmids used in this study.**

| Primer name  | Sequence (5'-3')                      |
|--------------|---------------------------------------|
| TatAS5CF     | ATGGGTGGTATCTGTATTTGGCAGTTATTGATT     |
| TatAS5CR     | TAACAATAACTGCCAAATACAGATACCACCCAT     |
| TatAI6CF     | ATGGGTGGTATCAGTTGTTGGCAGTTATTGATT     |
| TatAI6CR     | AATCAATAACTGCCAAACTGATACCACCCAT       |
| TatAL9CF     | AATTTGGCAGTTATTGTGTATTGCCGTCATGTT     |
| TatAL9CR     | AACATGACGGCAATACACAATAACTGCCAAATT     |
| TatAL10CF    | AGTATTTGGCAGTTATGCATTATTGCCGTCATC     |
| TatAL10CR    | GATGACGGCAATAATGCATAACTGCCAAATACT     |
| TatAI11CF    | AACGATGACGGCAATACACAATAACTGCCAAAT     |
| TatAI11CR    | AATTTGGCAGTTATTGTGTATTGCCGTCATGTT     |
| TatAA13CF    | GCAGTTATTGATTATTTGCGTCATCGTTGTACTG    |
| TatAA13CR    | CAGTACAACGATGACGCAAATAATCAATAACTG     |
| TatAV17CF    | GATTATTGCCGTCATCGTTTGTCTGCTTTTTGGCACC |
| TatAV17CR    | GGTGCCAAAAGCAGACAAACGATGACGGCAATAATC  |
| TatB_F6C_F   | GTGTTTGATATCGGTTGTAGCGAACTGCTATTG     |
| TatB_F6C_R   | CAATAGCAGTTTCGCTACAACCGATATCAAACAC    |
| TatB_E8C_F   | GATATCGGTTTTAGCTGCCTGCTATTGGTGTTTC    |
| TatB_E8C_R   | GAACACCAATAGCAGGCAGCTAAAACCGATATC     |
| TatB_L9C_F   | ATCGGTTTTAGCGAATGTCTATTGGTGTTTCATC    |
| TatB_L9C_R   | GATGAACACCAATAGACATTTCGCTAAAACCGAT    |
| TatB_L10C_F  | GGTTTTAGCGAACTGTGTTTGGTGTTTCATCATC    |
| TatB_L10C_R  | GATGATGAACACCAAACACAGTTTCGCTAAAACC    |
| TatB_L11C_F  | TTTAGCGAACTGCTATGTGTGTTTCATCATCGGC    |
| TatB_L11C_R  | GCCGATGATGAACACACATAGCAGTTTCGCTAAA    |
| TatB_G16C_F  | AACGGTAGCGGGCTTGTTCGCGCGTTGCGTTC      |
| TatB_G16C_R  | GAACGCAACGCGCGAAACAAGCCCGCTACCGTT     |
| TatC_V198C_F | CGCCCGTATGTGCTGTGTGGTGCATTTCGTTGTC    |
| TatC_V198C_R | GACAACGAATGCACCACACAGCACATACGGGCGG    |
| TatC_M205C_F | GCATTCGTTGTTCGGGTGTTTGCTGACGCCGCCG    |
| TatC_M205C_R | CGGCGGCGTCAGCAAACACCCGACAACGAATGC     |
| TatC_L206C_F | TTCGTTGTTCGGGATGTGTCTGACGCCGCCGGAT    |
| TatC_L206C_R | ATCCGGCGGCGTCAGACACATCCCGACAACGAA     |
| TatC_L207C_F | GTTGTTCGGGATGTTGTGTACGCCGCCGGATGTC    |
| TatC_L207C_R | GACATCCGGCGGCGTACACAACATCCCGACAAC     |
| TatB_T208C_F | GTCGGGATGTTGCTGTGCCCGCCGGATGTCTTC     |
| TatB_T208C_R | GAAGACATCCGGCGGGCACAGCAACATCCCGAC     |
| TatB_P209C_F | GGGATGTTGCTGACGTGCCCGGATGTCTTCTCG     |
| TatB_P209C_R | CGAGAAGACATCCGGGCACGTCAGCAACATCCC     |
| TatB_P210C_F | ATGTTGCTGACGCCGTGTGATGTCTTCTCGCAA     |
| TatB_P210C_R | TTGCGAGAAGACATCACACGGCGTCAGCAACAT     |
| TatC_D211C_F | TTGCTGACGCCGCCGTGTGTCTTCTCGCAAACG     |
| TatC_D211C_R | CGTTTGCAGAGAAGACACACGGCGGCGTCAGCAA    |
| TatB_V212C_F | CTGACGCCGCCGGATTGTTTCTCGCAAACGCTG     |

|              |                                        |
|--------------|----------------------------------------|
| TatB_V212C_R | CAGCGTTTGCGAGAAACAATCCGGCGGCGTCAG      |
| TatC_F213C_F | CGCCGGATGTCTGCTCGCAAACGCTG             |
| TatC_F213C_R | CAGCGTTTGCGAGCAGACATCCGGCG             |
| TatC_S214C_F | GCCGGATGTCTTCTGCCAAACGCTGTTGG          |
| TatC_S214C_R | CCAACAGCGTTTGGCAGAAGACATCCGGC          |
| TatC_Q215C_F | CGGATGTCTTCTCGTGCACGCTGTTGGCGATC       |
| TatC_Q215C_R | GATCGCCAACAGCGTGCACGAGAAGACATCCG       |
| TatC_T216C_F | GATGTCTTCTCGCAATGCCTGTTGGCGATCCCG      |
| TatC_T216C_R | CGGGATCGCCAACAGGCATTGCGAGAAGACATC      |
| TatC_I220C_F | CAAACGCTGTTGGCGTGCCCGATGTACGCTCTG      |
| TatC_I220C_R | CAGAGCGTACATCGGGCACGCCAACAGCGTTTG      |
| TatC_E227C_F | GATGTACGCTCTGTTTTGCATCGGTGTCTTCTTC     |
| TatC_E227C_R | GAAGAAGACACCGATGCAAAACAGAGCGTACATC     |
| TatC_F94A_F  | TATCAGGTGTGGGCAGCTATCGCCCCAGCGCTG      |
| TatC_F94A_R  | CAGCGCTGGGGCGATAGCTGCCACACCTGATA       |
| TatC_E103A_F | TGTATAAGCATGCGCGTCGCCTGGTG             |
| TatC_E103A_R | CCACCAGGCGACGCGCATGCTTATAC             |
| BamHI-TatB_F | CCGGATCCGTGTTTGATATCGGTTTTAGCGAACTGC   |
| SphI_TatC_R  | GTCCGCATGCTTATTCTTCAGTTTTTTTCGCTTTCTGC |

**Table S2. Oligonucleotides used in this study**

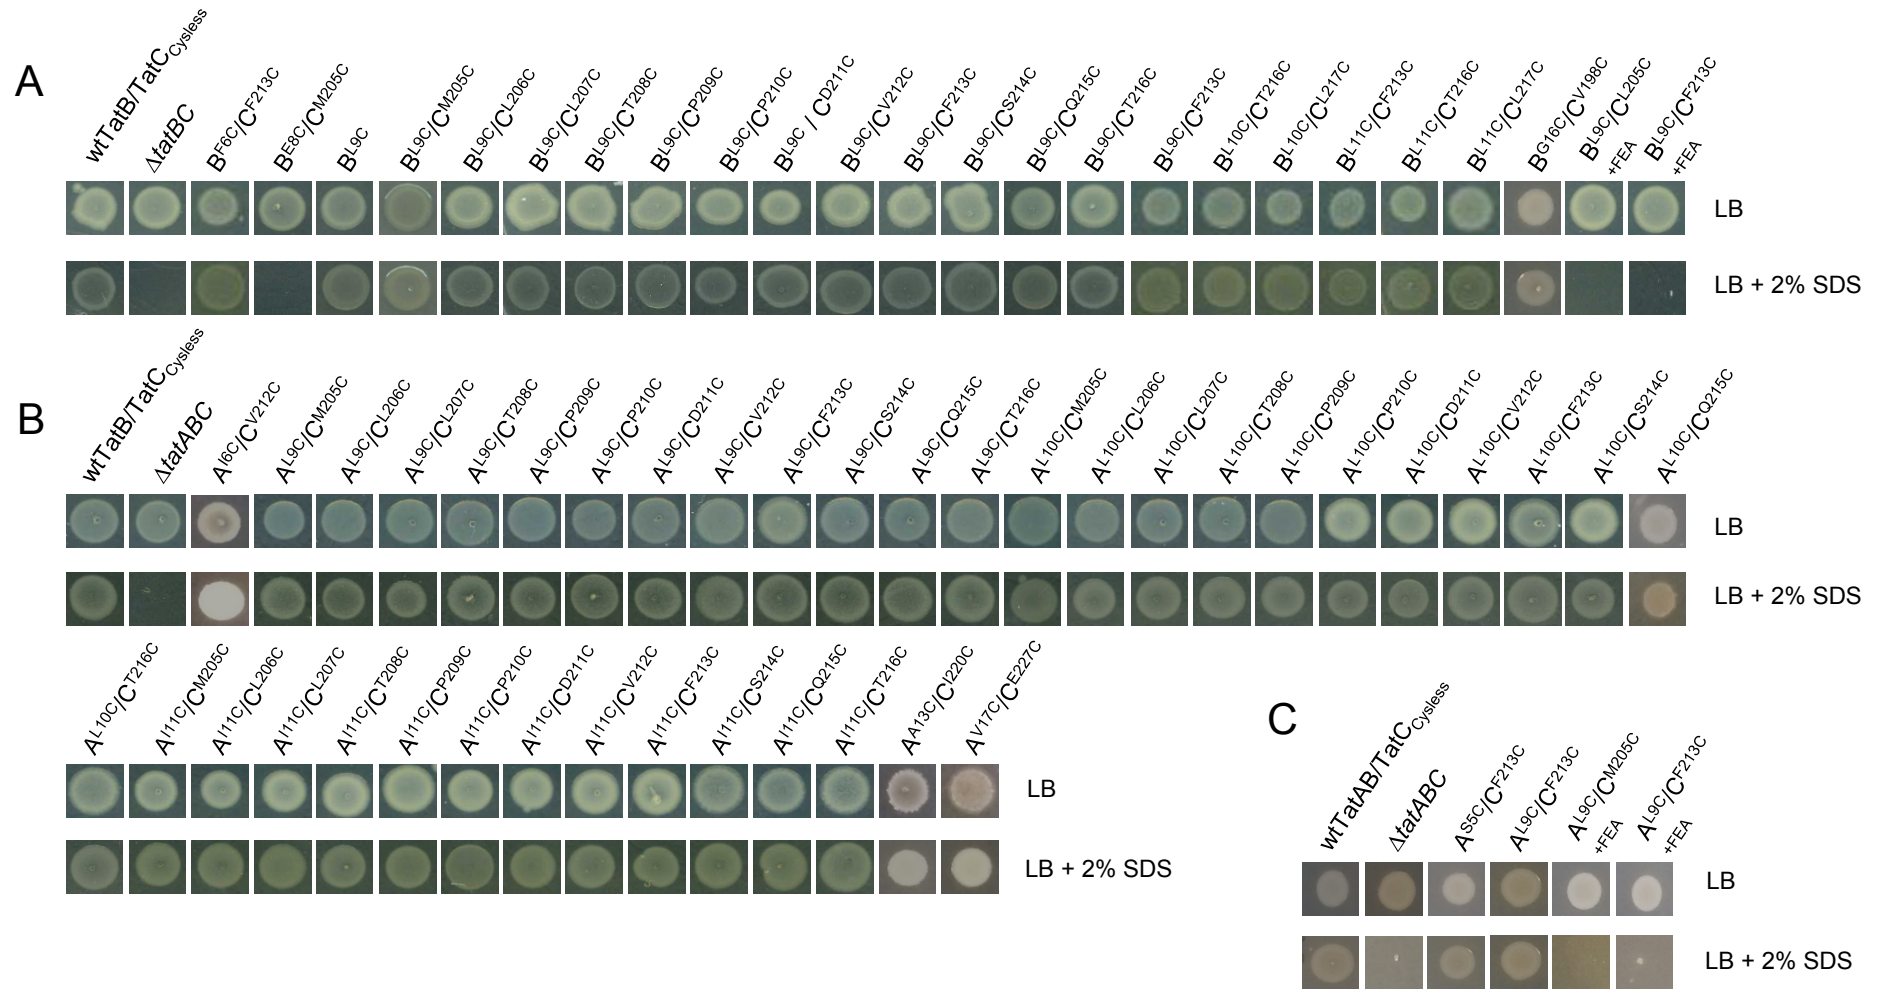

**Figure S1. Phenotypic analysis of Tat activity in cells harbouring cysteine substitutions of TatA, TatB and TatC. A.** TatB/TatC mutant pairs. Strain MC4100 $\Delta$ BC harbouring either an empty vector ( $\Delta$ tatBC) or plasmid p101C\*BC encoding the indicated TatB and TatC variants alongside wild type TatA was spotted on LB medium or LB medium containing 2% SDS. **B.** and **C.** TatA/TatC mutant pairs **B.** Strain DADE-P harboring either an empty vector ( $\Delta$ tatABC) or plasmid pUNITATCC4 encoding the indicated Tata and TatC variants alongside wild type TatB was spotted on LB medium or LB medium containing 2% SDS. **C.** Strain DADE harbouring either an empty vector ( $\Delta$ tatABC) or plasmid pTAT101 encoding the indicated Tata and TatC variants alongside wild type TatB was spotted on LB medium or LB medium containing 2% SDS. In each case an 8 $\mu$ l aliquot of each strain/plasmid combination following aerobic growth to an OD<sub>600</sub> of 1.0 was spotted and incubated for 16 hr at 37°C prior to photographing.

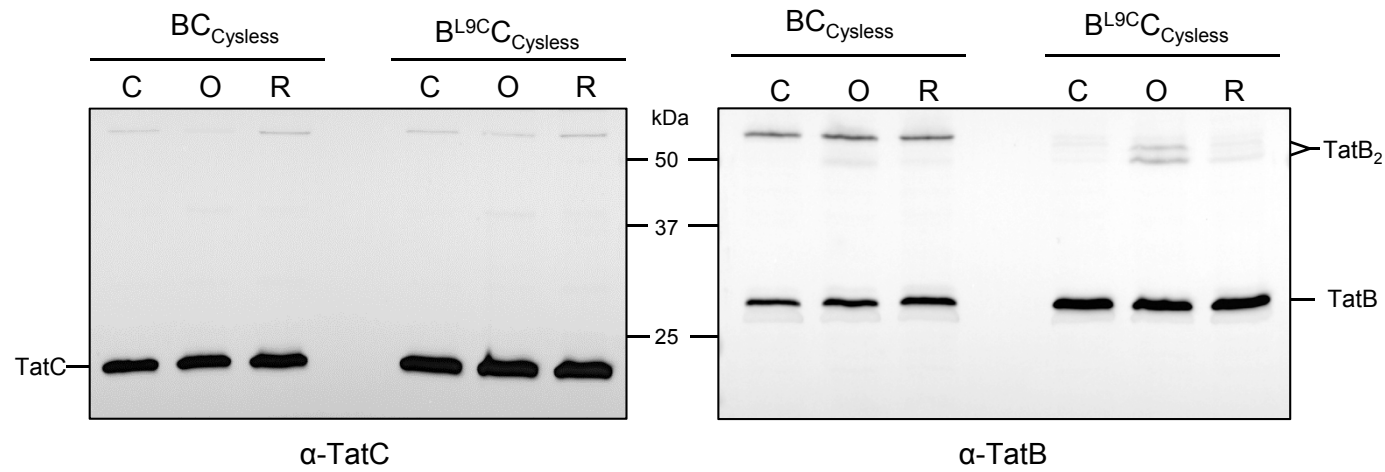

**Figure S2. The TatB homodimer is recognized as a doublet band by the TatB anti-peptide antibody.** Western blot analysis of membranes from *E. coli* strain MC4100 $\Delta$ BC producing Cys-less TatC along with either native (Cys-less) TatB or TatBL9C, as indicated, from plasmid p101C\*BC. Whole cells were either exposed to 1.8mM CuP (oxidising; O) or 10 mM DTT (reducing; R) for 1 min, or left untreated (control; C). TatC and TatB were visualised by immunoblotting using anti-TatC or anti-TatB peptide antibodies.



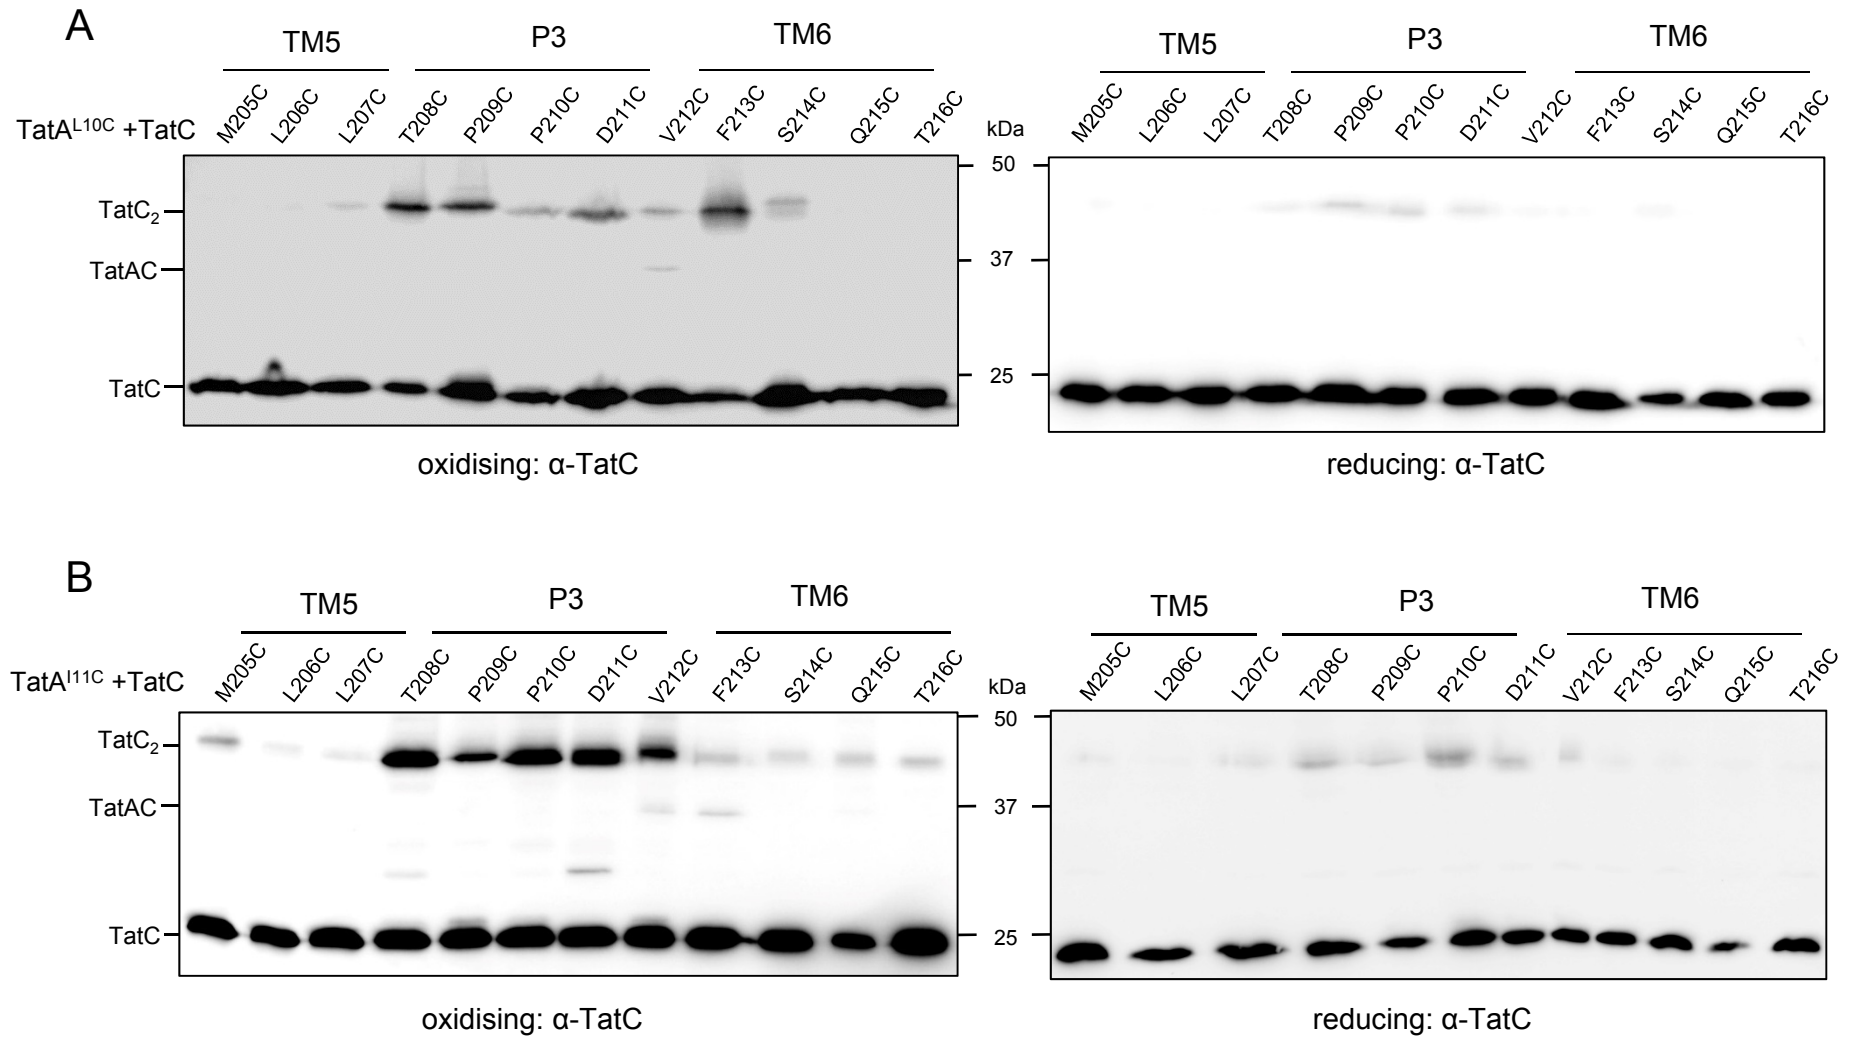

**Figure S3. TatA<sup>L10C</sup> interacts with TatC<sup>V212C</sup> and TatA<sup>I11C</sup> interacts with TatC<sup>V212C/F213C</sup> *in vivo*.** **A.** and **B.** Western blot analysis (separated on 12.5% polyacrylamide gels) of whole cells of *E. coli* strain DADE-P producing **A.** TatA<sup>L10C</sup> or **B.** TatA<sup>I11C</sup> alongside the indicated Cys substitutions in TatC (and wild type TatB, from plasmid pUNITATCC4) following exposure to 1.8mM CuP (oxidizing) or 10 mM DTT (reducing) for 1 min. Crosslinked products were visualized by immunoblotting using anti-TatC antibodies.

A

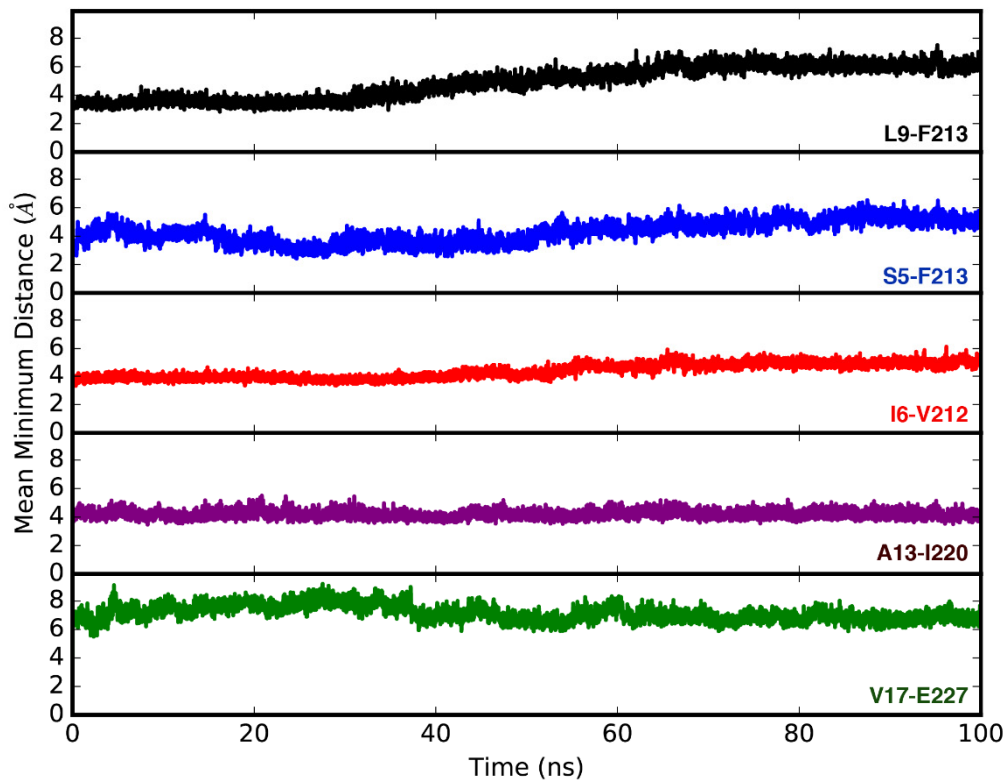

B

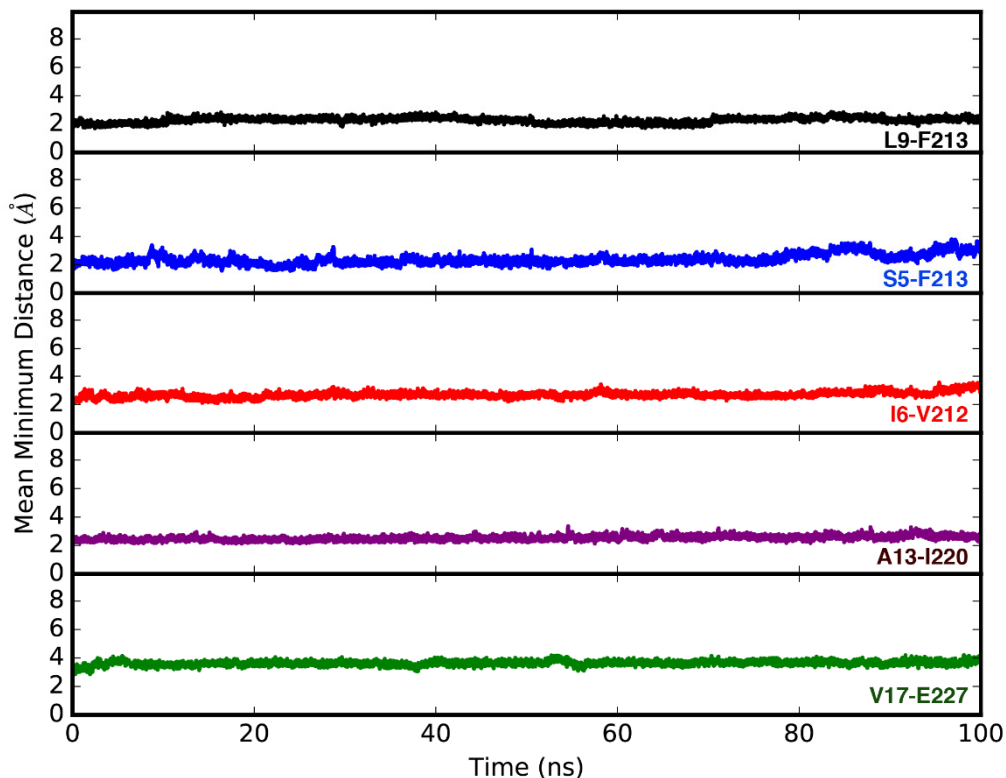

**Figure S4. Molecular simulations of the interactions of TatA with TatC at its constitutive site and TatB with the TatC polar cluster site.** TatA, TatB and TatC, assembled with TatB in the polar cluster site and TatA in its constitutive site, simulated for 100 ns as either **A.** Heterotrimeric  $TatA_1B_1C_1$  or **B.** Heterononameric  $TatA_3B_3C_3$ . The plots show the mean minimum distance over time between the residues of TatA and TatC that are shown to be able to form cross-links. In both instances the residues remain in close proximity to one another, however, the  $TatA_3B_3C_3$  complex appears to stabilise the overall motions of the individual subunits and therefore the distances between residues remain consistently low.

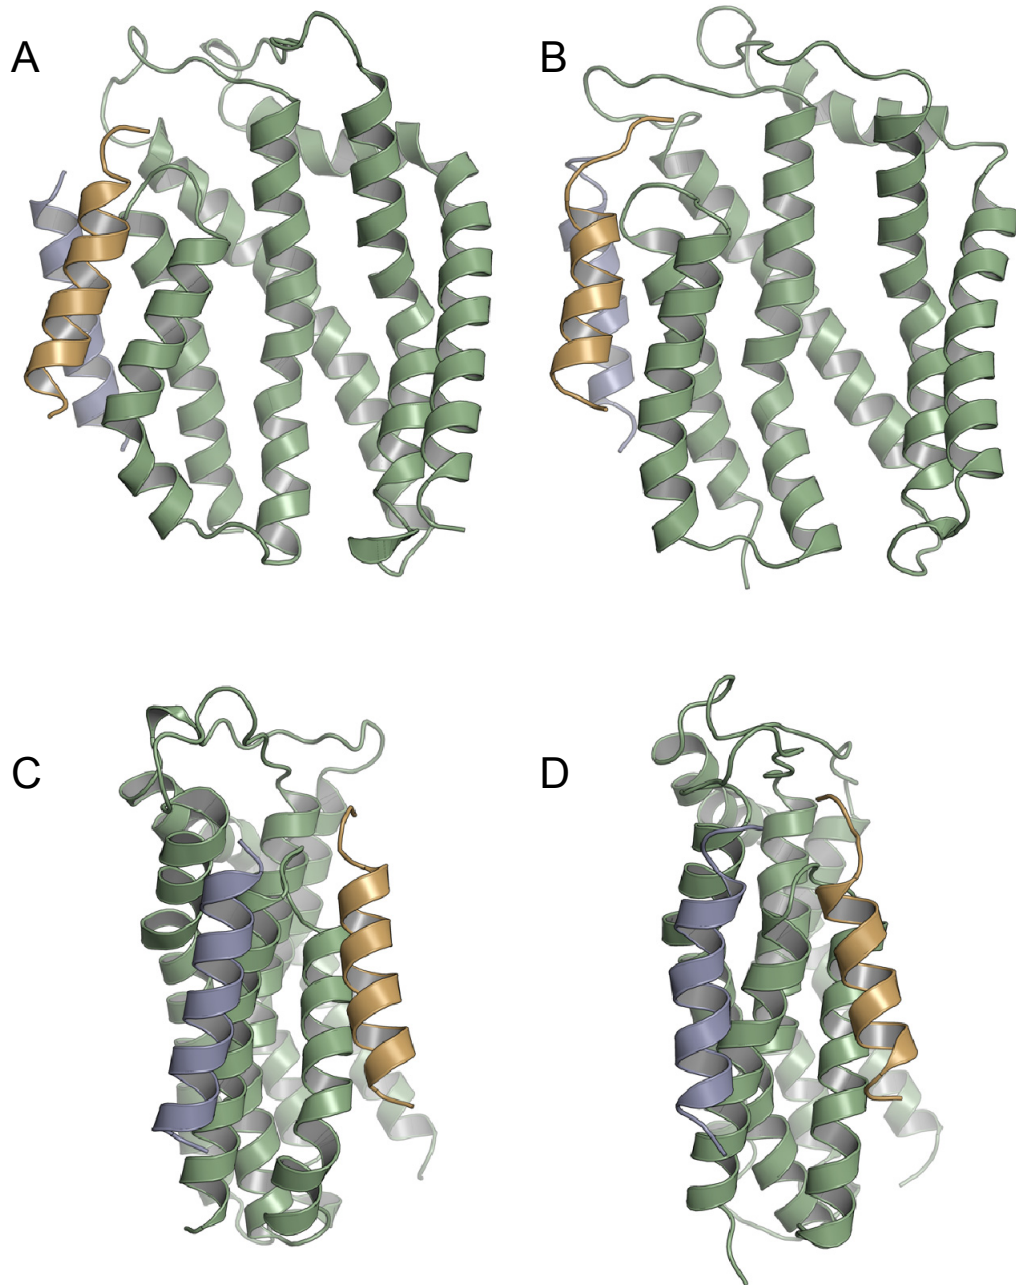

**Figure S5. Illustrative snapshots of the molecular simulations of the TatABC complex under resting conditions, viewed from within the membrane, with TatB in the polar cluster binding site and TatA in the adjacent TM6 binding site of TatC. (A, C) 0 ns and (B, D) 100 ns. TatA is shown in silver-blue, TatB in gold and TatC in green.**

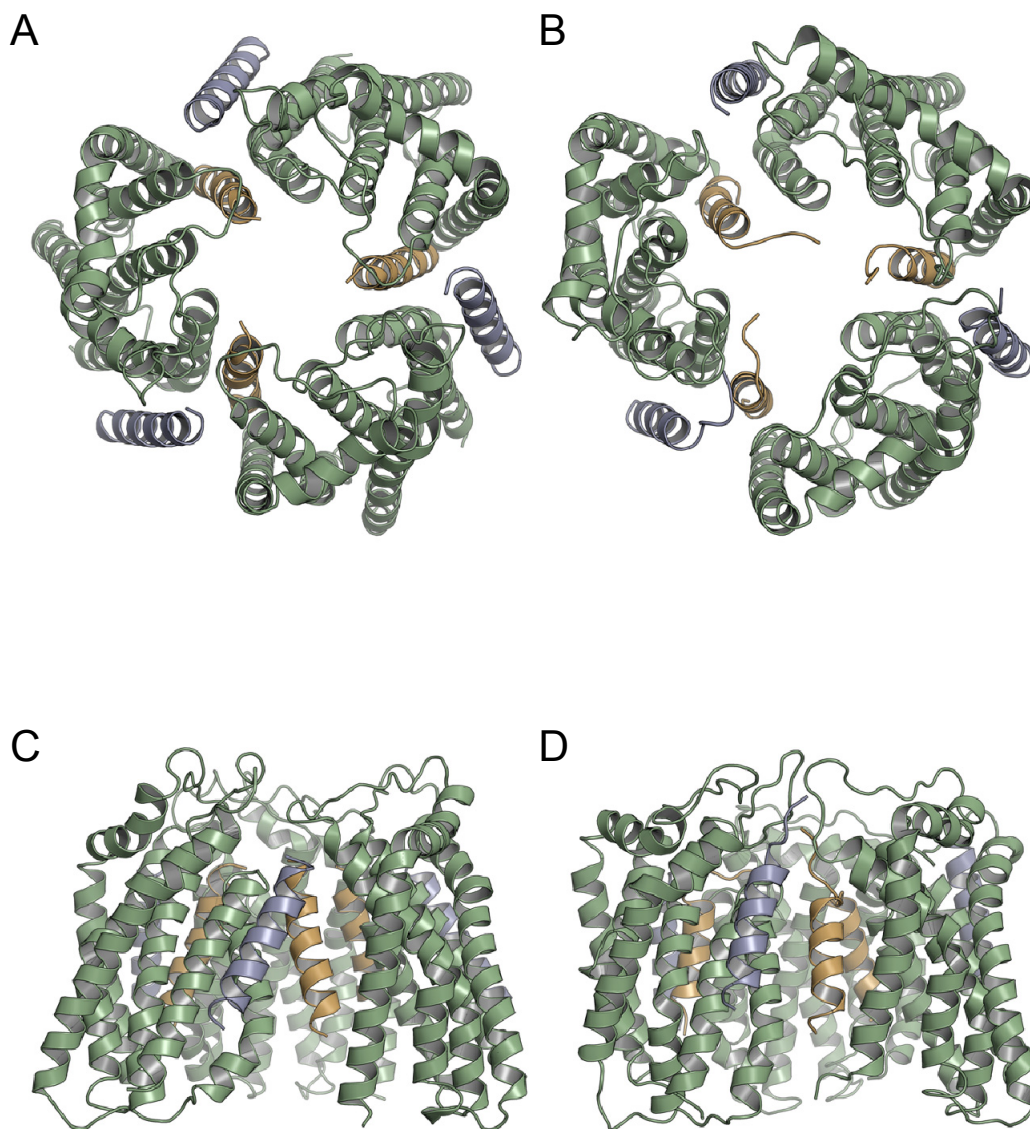

**Figure S6. Illustrative snapshots of the molecular simulations of the trimeric TatABC complex under resting conditions with TatA in the polar cluster binding site and TatB in the adjacent TM6 binding site of TatC. (A, B) viewed from the periplasm and (C, D) within the membrane, at (A, C) 0 ns and (B, D) 100 ns. TatA is shown in silver-blue, TatB in gold and TatC in green.**

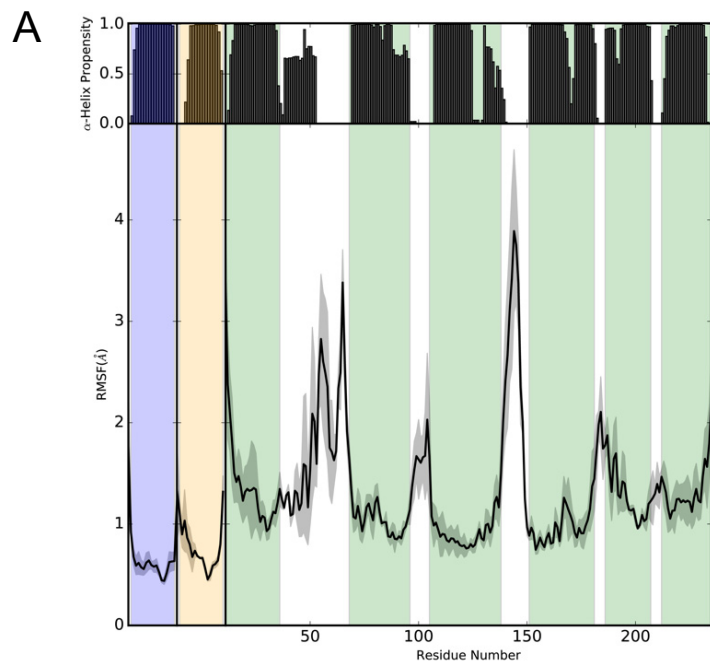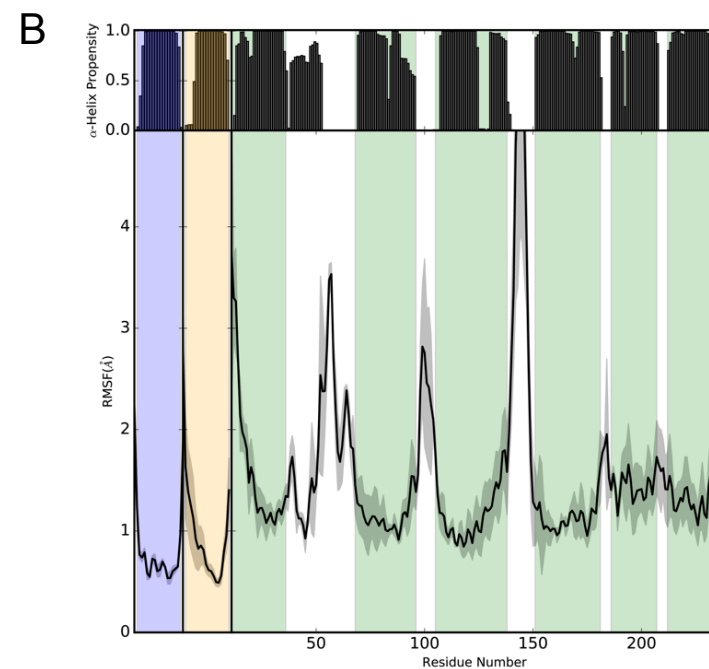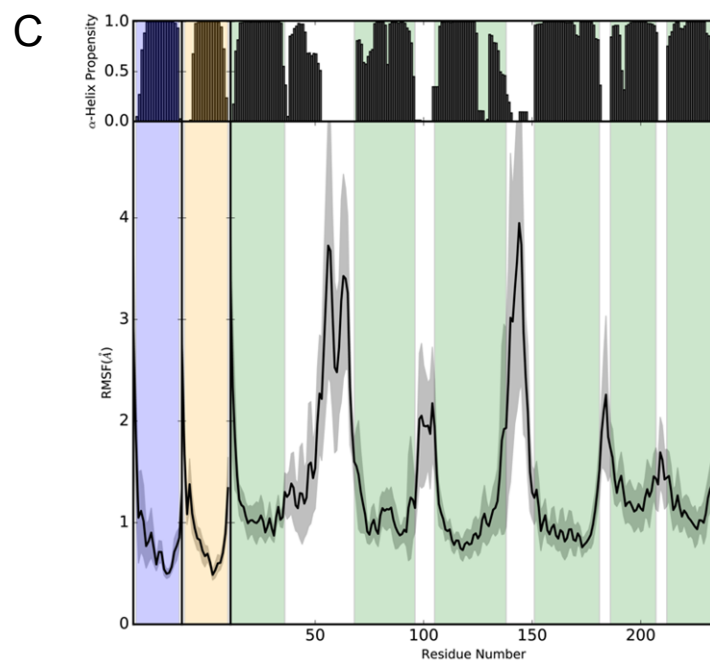

**Figure S7. Structural stability plots for the modelled Tat protein complexes from molecular simulations.** TatA, TatB and TatC, assembled with TatB in the polar cluster site and TatA in its constitutive site, for **A.** the heterotrimeric and **C.** heterononameric complexes. For **B.** TatA is in the polar cluster site and TatB in its constitutive site in a heterotrimeric TatABC complex. The plots illustrate the retention of  $\alpha$ -helical secondary structure (black bars) for each molecular system, with the lower panels in each plot showing the residue fluctuations.  $\alpha$ -helical regions of the plots are coloured blue for TatA, yellow for TatB and green for TatC.

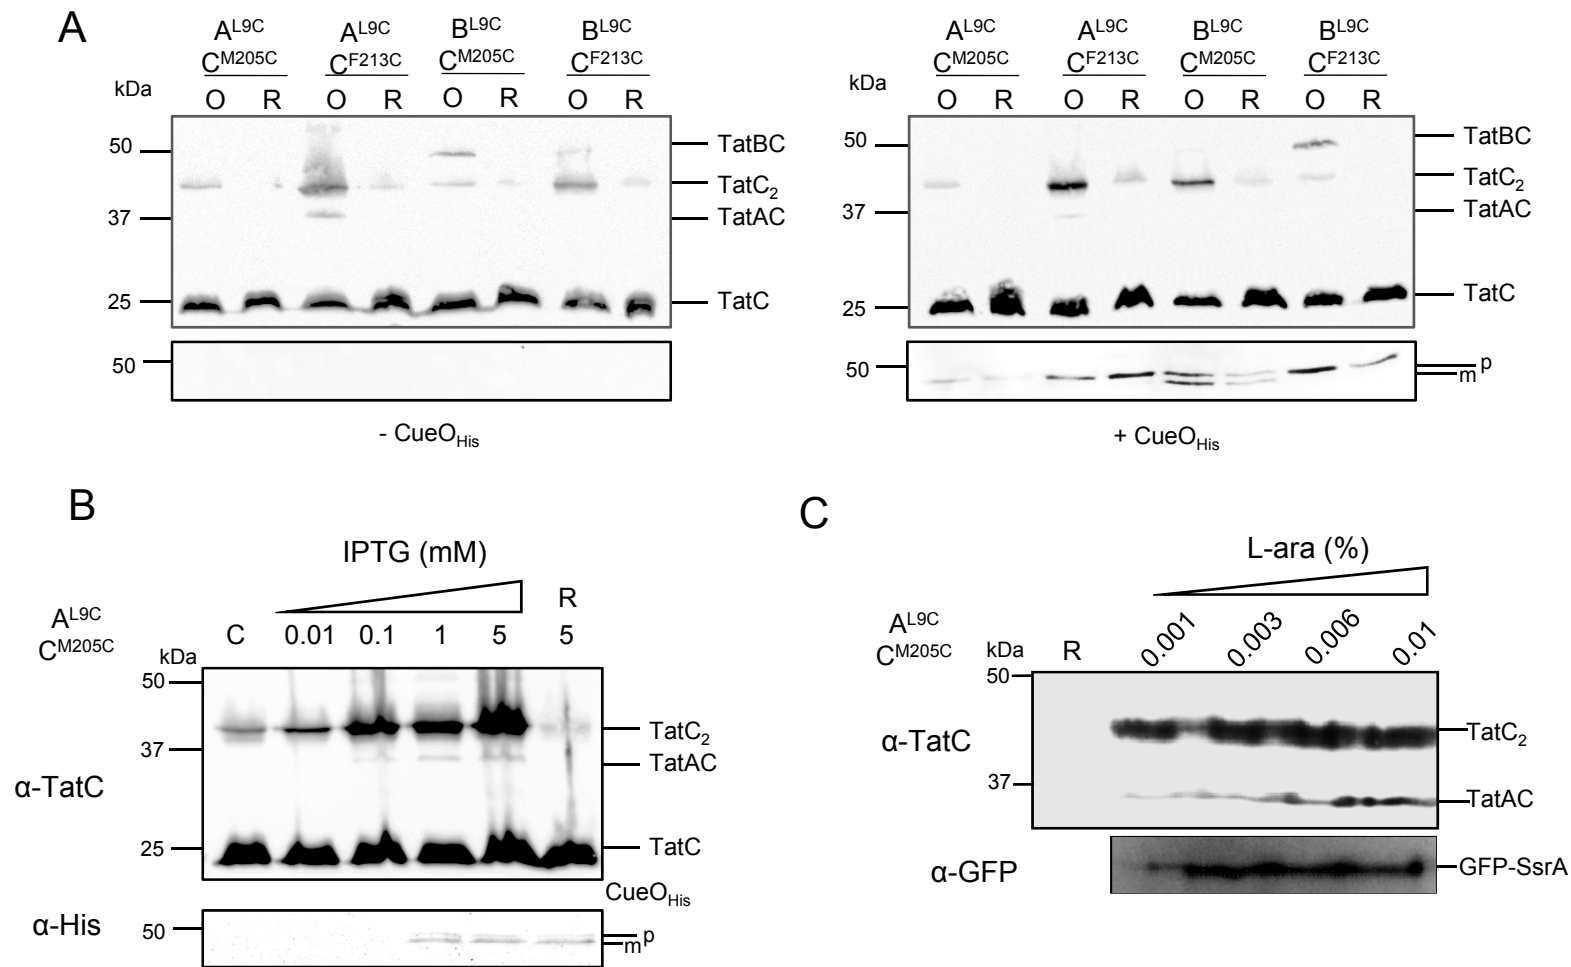

**Figure S8. Overproduction of Tat substrates alter TatA and TatB crosslinking to TatC.** **A.** Strain DADE harbouring plasmid p101CC4 producing either TatA<sup>L9C</sup> or TatB<sup>L9C</sup>, alongside either TatC<sup>M205C</sup> or F<sup>213C</sup> and plasmid pQE80-CueO where indicated, was incubated in the presence of 1.8mM CuP for 1 min (O) or 10mM DTT for 1min (R). Following quenching, membrane fractions were immunoblotted with anti-TatC antiserum. **B.** Strain DADE harbouring plasmid p101CC4 producing TatA<sup>L9C</sup> alongside TatC<sup>M205C</sup> and plasmid pQE80-CueO, was left untreated (C) or incubated with IPTG concentrations between 0.01mM to 5mM as indicated. All samples were incubated in the presence of 1.8mM CuP for 1 min except for the reducing control (R), which was treated with 10mM DTT for 1min. Membrane fractions were immunoblotted with an anti-TatC antiserum. In A. and B. aliquots of the soluble fraction following membrane preparation were retained and analyzed by immunoblotting with an anti-Histag antibody. **C.** Strain DADE-P harbouring plasmids pUNITATCC4 producing TatA<sup>L9C</sup> and wildtype TatB alongside TatC<sup>M205C</sup> and pTGS encoding SsrA-tagged GFP fused to the TorA signal sequence was incubated in the presence of the indicated concentration of L-arabinose for 20 min before were addition of 1.8mM CuP (or 10mM DTT for sample marked R). Samples were incubated for 1 min, after which whole cells were analysed by immunoblotting with an anti-TatC antiserum. The bottom panel shows anti-GFP immunoblot of the same samples following arabinose addition but prior to incubation with CuP.

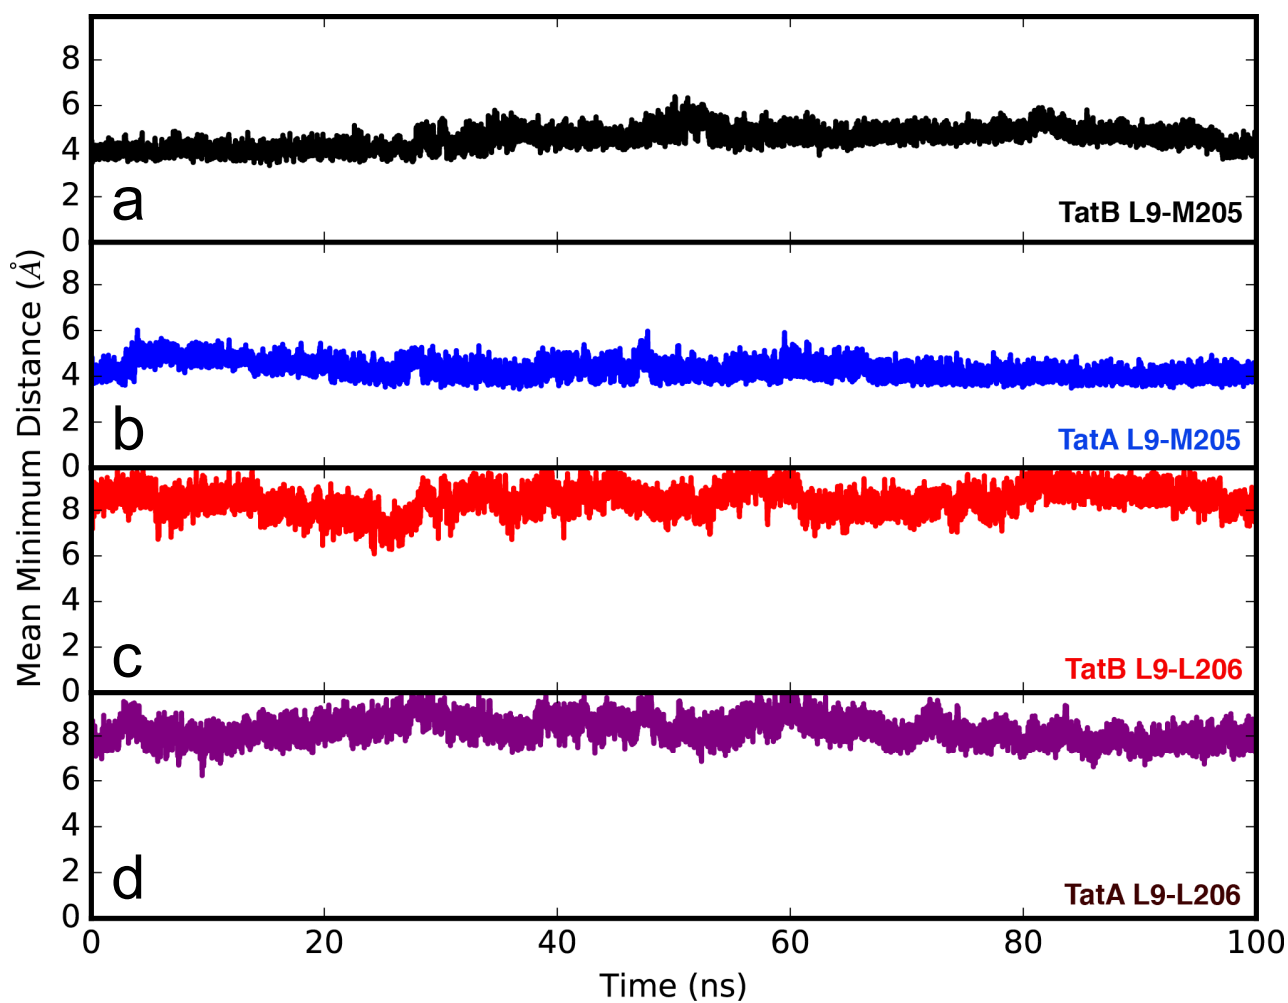

**Figure S9. Molecular simulations of the interactions of TatA and TatB with each of the binding sites on TatC.** **A** and **C.** TatA, TatB and TatC, assembled with TatB in the polar cluster site and TatA in its constitutive site for panels **B.** and **D.** TatA is in the polar cluster site and TatB in the constitutive site. Plots show the evolution of the minimum distances between L9 and either M205 or L206 during the 100 ns simulations. For both TatA and TatB, the simulations retain the close proximity between L9 and M205 at ~4 Å, while L9 to L206 is more variable, at around 8 Å.

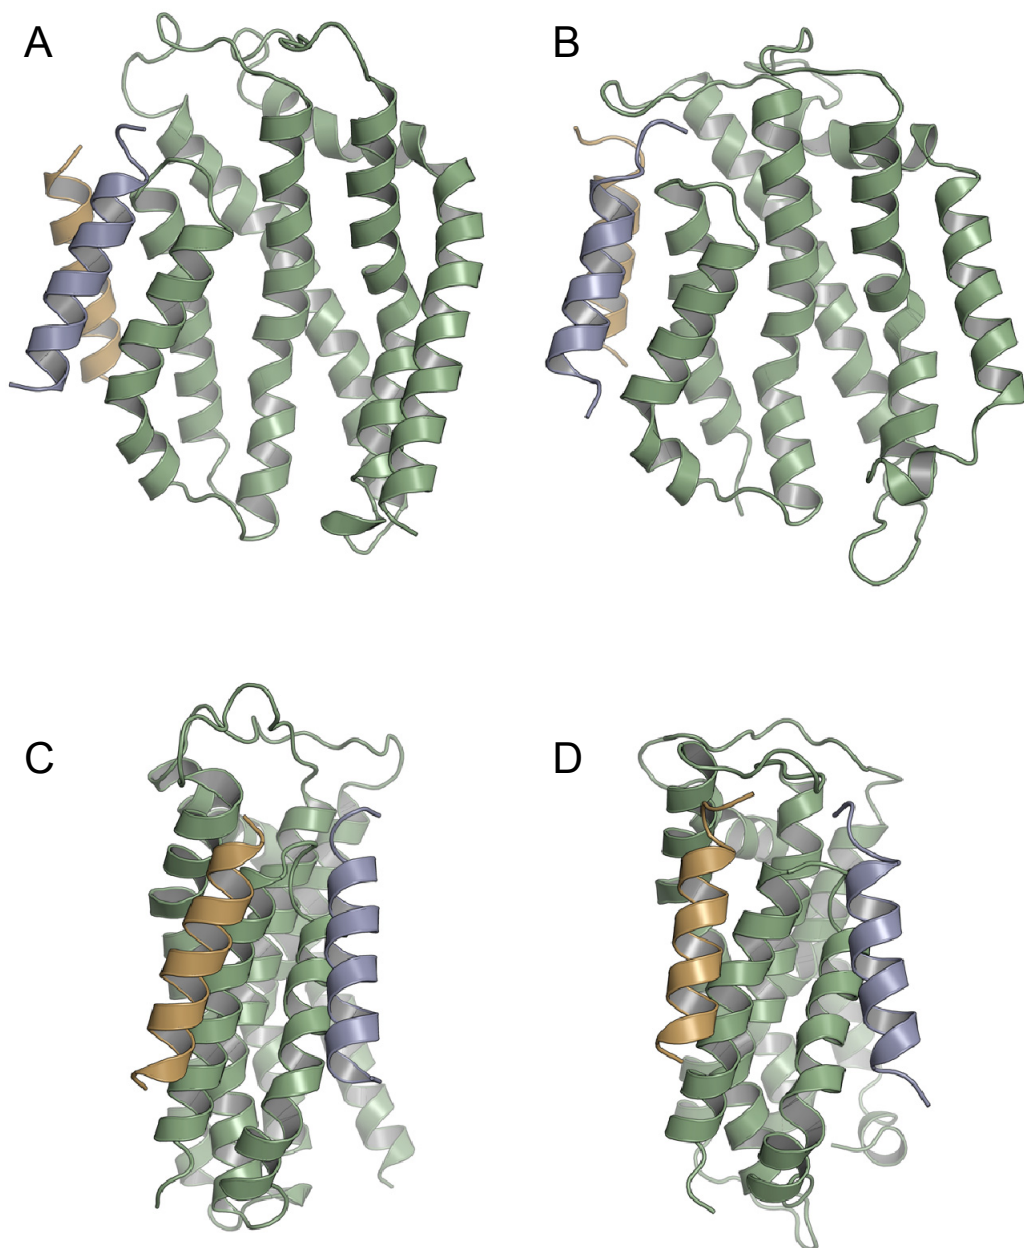

**Figure S10.** Illustrative snapshots of the molecular simulations of the TatABC complex upon substrate binding, viewed from within the membrane, with TatA in the polar cluster binding site and TatB in the adjacent TM6 binding site of TatC. (A, C) 0 ns and (B, D) 100 ns. TatA is shown in silver-blue, TatB in gold and TatC in green.
